# Supplementary material for: In Vitro Evaluation of Leuconostoc mesenteroides Cell-Free-Supernatant GBUT-21 against SARS-CoV-2
Source: MDPI journal article supplement (doi:10.3390/vaccines10101581), 2022-09-21
Supplement: s1 [file s1]

Table S1. Biochemical characterization of *Leuconostoc mesenteroides* GBUT-21

| Active ingredients                  | Results | Active ingredients        | Results |
|-------------------------------------|---------|---------------------------|---------|
| Glycerol                            | –       | Salicin                   | –       |
| Erythritol                          | –       | D-Cellobiose              | +       |
| D-Arabinose                         | –       | D-Maltose                 | +       |
| L-Arabinose                         | +       | D-Lactose (bovine origin) | +       |
| D-Ribose                            | +       | D-Melibiose               | +       |
| D-Xylose                            | +       | D-Saccharose              | +       |
| L-Xylose                            | –       | D-Trehalose               | +       |
| D-Adonitol                          | –       | Inulin                    | –       |
| Methyl- $\beta$ -D-Xylopyranoside   | –       | D-Melezitose              | –       |
| D-Galactose                         | +       | D-Raffinose               | +       |
| D-Glucose                           | +       | Amidon (starch)           | –       |
| D-Fructose                          | +       | Glycogen                  | –       |
| D-Mannose                           | +       | Xylitol                   | –       |
| L-Sorbose                           | –       | Gentiobiose               | +       |
| L-Rhamnose                          | –       | D-Turanose                | +       |
| Dulcitol                            | +       | D-Lyxose                  | –       |
| Inositol                            | –       | D-Tagatose                | –       |
| D-Mannitol                          | –       | D-Fucose                  | –       |
| D-Sorbitol                          | +       | L-Fucose                  | –       |
| Methyl- $\alpha$ -D-Mannopyranoside | –       | D-Arabitol                | –       |
| Methyl- $\alpha$ -noside            | –       | L-Arabitol                | –       |
| N-acetylglucosamine                 | +       | Potassium Gluconate       | +       |
| Amygdalin                           | +       | Potassium 2-Ketogluconate | –       |
| Arbutin                             | +       | Potassium 5-Ketogluconate | –       |
| Esculin                             | +       |                           |         |

(-) The bacterium does not use this carbohydrate. (+) The bacterium uses this carbohydrate.
